# Supplementary material for: Electrochemical immunoassay based on polythionine as the signal source for the sensitive detection of carcinoma embryonic antigen
Source: Royal Society of Chemistry journal article supplement (doi:10.1039/c5ay02580j), 2015-01-01
Supplement: c5ay02580j1.pdf [file c5ay02580j1.pdf]

Electronic Supplementary Information (ESI)

## **Electrochemical immunoassay based on polythionine as signal source for the sensitive detection of carcinoma embryonic antigen**

Min Chen<sup>a,\*</sup>, Chengfei Zhao<sup>b,1</sup>, Qingshan Xu<sup>c</sup>, Biqiong Nie<sup>d</sup>, Liufang Xu<sup>d</sup>, Shaohuang Weng<sup>e,\*</sup> and Xinhua Lin<sup>e</sup>

a: Department of Orthopedic Surgery, Affiliated Union Hospital of Fujian Medical University, Fuzhou 350001, China

b: Pharmaceutical and Medical Technology College of Putian University, Putian 351100, China

c: Department of Orthopedic Surgery, Affiliated Mindong Hospital of Fujian Medical University, Ningde 355000, China

d: School of Basic Medical Sciences, Fujian Medical University, Fuzhou 350108, China

e: Department of Pharmaceutical Analysis, Faculty of Pharmacy, the higher educational key laboratory for Nano Biomedical Technology of Fujian Province, Fujian Medical University, Fuzhou 350108, China

---

Corresponding author: Weng, S., E-mail: [shweng@fjmu.edu.cn](mailto:shweng@fjmu.edu.cn), Tel./fax: +86 591 22862016; Chen, M., E-mail: [chenminfz006@163.com](mailto:chenminfz006@163.com); Tel./fax: +86 591 83357896 .

1: Min Chen and Chengfei Zhao contributed equally to this work.

Fig. S1. AFM images of bare GCE (A), PTh/GCE (B), nafion/PTh/GCE (C) and antibody/nafion/PTh/GCE (D).

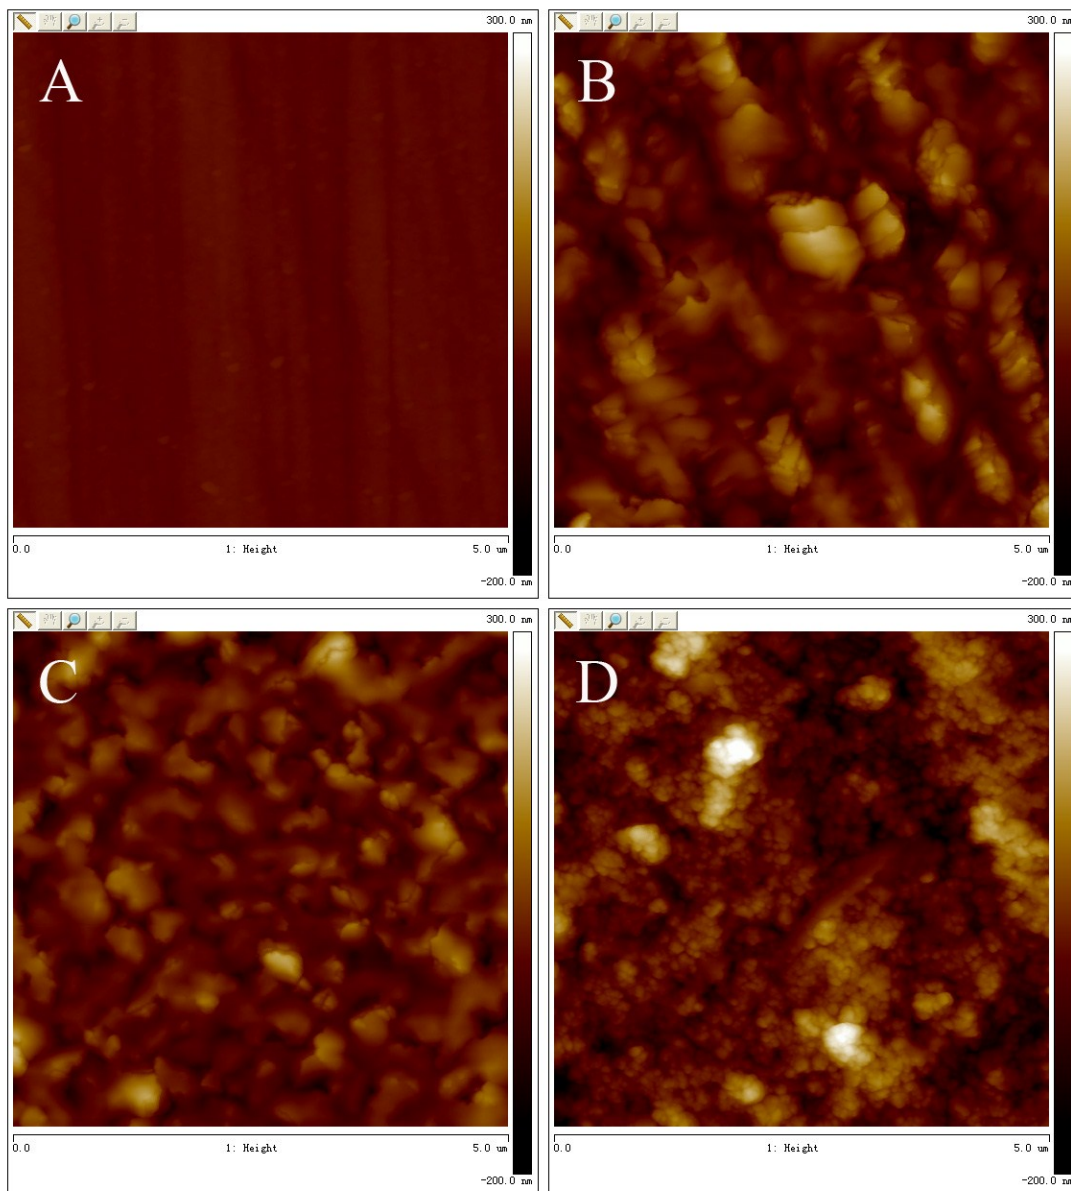

Table S1. The detection of CEA in the fetal calf serum samples through the standard addition method using the prepared immunosensor.

| <b>Samples</b>                                          | <b>1</b>    | <b>2</b>   | <b>3</b>   |
|---------------------------------------------------------|-------------|------------|------------|
| <b>Add a scalar (ng•ml<sup>-1</sup>)</b>                | 1.0         | 5          | 10.0       |
| <b>Found<sup>a</sup> (ng•ml<sup>-1</sup>) ± RSD (%)</b> | 0.966 ± 4.4 | 4.79 ± 5.6 | 9.74 ± 2.5 |
| <b>Recovery</b>                                         | 96.6%       | 95.8%      | 97.4%      |

a The data stood for the average value of three independent detection.

Table S2. The results of CEA levels in the human serum samples using the chemiluminescent immunoassay and prepared immunosensor.

| <b>Samples</b> | <b>Chemiluminescent Immunoassay</b> | <b>This work</b>                                       |                       |
|----------------|-------------------------------------|--------------------------------------------------------|-----------------------|
|                |                                     | <b>Found<sup>a</sup>(ng•ml<sup>-1</sup>) ± RSD (%)</b> | <b>Relative Error</b> |
| 1              | 11.60                               | 10.96 ± 6.8                                            | -5.5%                 |
| 2              | 6.80                                | 6.55 ± 4.7                                             | -3.7%                 |
| 3              | 1.60                                | 1.67 ± 5.3                                             | 4.4%                  |
| 4              | 5.90                                | 5.62 ± 6.3                                             | -4.8%                 |
| 5              | 0.85                                | 0.81 ± 7.5                                             | -4.7%                 |

a The data stood for the average value of three independent detection.
